# Supplementary material
Source: ML conference proceedings conference paper supplement (https://openaccess.thecvf.com/content/ICCV2025/html/Bi_A_Simple_yet_ICCV_2025_paper.html)
Supplement: Supplementary file 1 [file Bi_A_Simple_yet_ICCV_2025_supplemental.pdf]

# A Simple yet Mighty Hartley Diffusion Versatilist for Generalizable Dense Vision Tasks

## Supplementary Material

### 7. More Visual Prediction Results

Fig. 8, Fig. 9 and Fig. 10 provides more visual prediction results between the proposed `HarDiff` and some state-of-the-art methods, on various unseen target domains. The proposed `HarDiff` shows a more robust prediction on each of the three dense vision tasks.

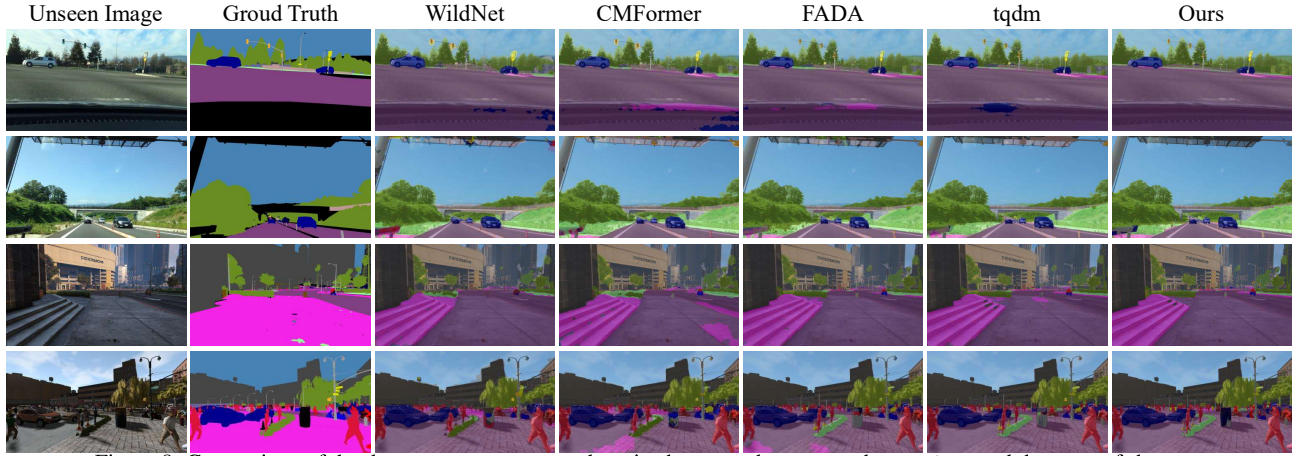

Figure 8. Comparison of the dense on unseen target domains between the proposed  $\text{HarDiff}$  and the state-of-the-art.

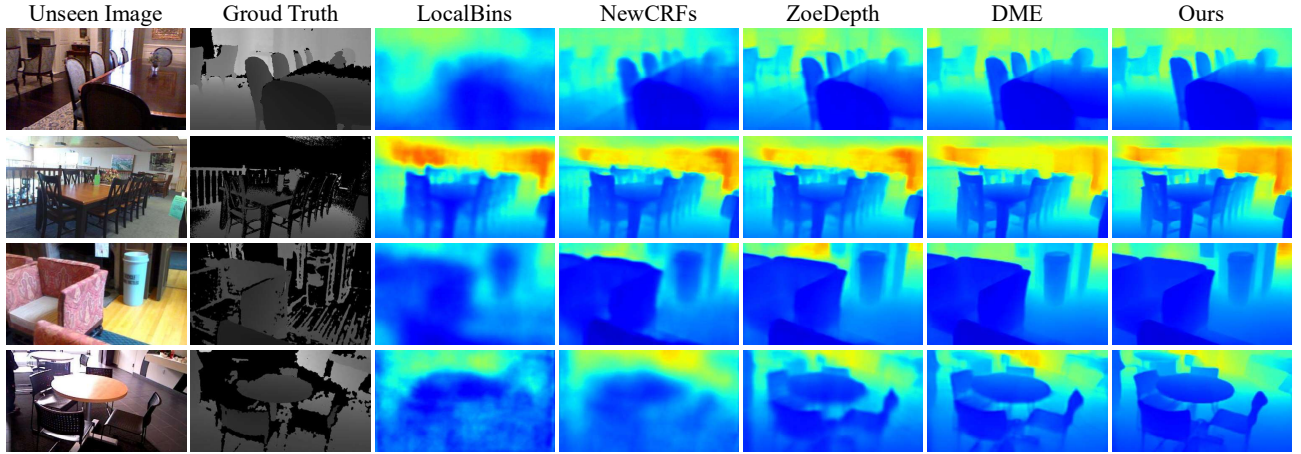

Figure 9. Comparison of the depth estimation map on unseen target domains between the proposed  $\text{HarDiff}$  and the state-of-the-art methods.

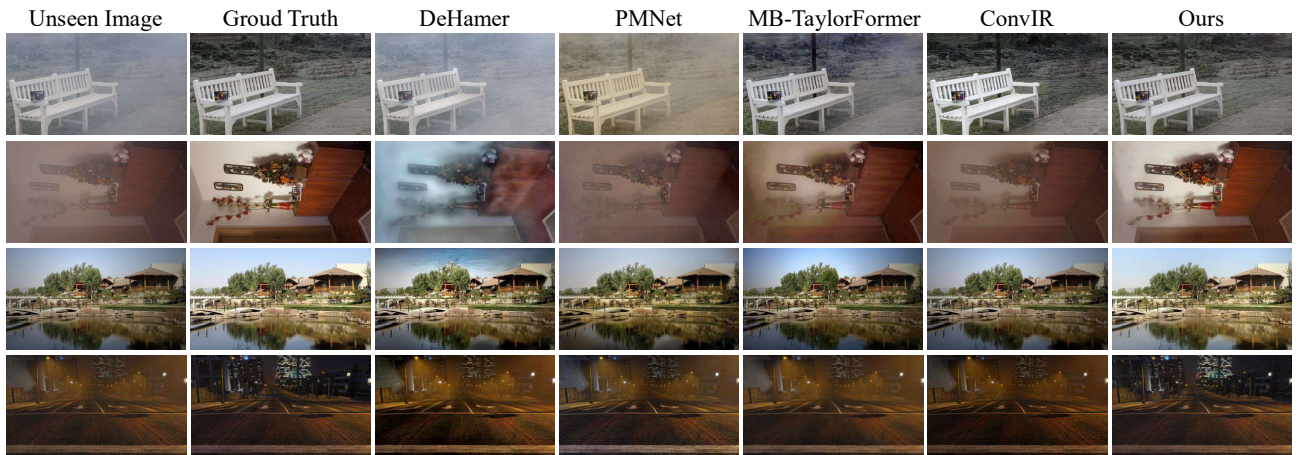

Figure 10. Comparison of the haze removal map on unseen target domains between the proposed  $\text{HarDiff}$  and the state-of-the-art methods.
